1     **Recent advances in efficacy of corticosteroids as adjunct therapy for**  
2             **the treatment of community-acquired pneumonia in children: a**  
3                     **systematic review and meta-analysis.**

4  
5     Lydia Mukanhaire<sup>1,2</sup>, Junyan Wang<sup>2</sup>, Xiaoyu Zong<sup>2</sup>, Lingjian Zhang<sup>2</sup>, Xiaohui  
6     Zhou<sup>1#</sup>, Jian Gong<sup>1,2#</sup>

7     Affiliated Institutions:

8     1.School of Basic Medicine and Clinical Pharmacy, China Pharmaceutical University,  
9     Nanjing 211198, P.R. China.

10    2.Research Group of Jian Gong on Pharmacoepidemiology and Clinical Drug  
11    Evaluation, School of Life Science and Biopharmaceutics, Shenyang Pharmaceutical  
12    University, Shenyang 110016, P.R. China.

13

14    Authors email addresses:

15    Lydia Mukanhaire: [lydiamukanhaire@gmail.com](mailto:lydiamukanhaire@gmail.com)

16    Junyan Wang: [3032245115@qq.com](mailto:3032245115@qq.com)

17    Xiaoyu Zong: [1277782939@qq.com](mailto:1277782939@qq.com)

18    Lingjian Zhang: [564868976@qq.com](mailto:564868976@qq.com)

19

20    #Correspondence authors:

21    Xiaohui Zhou, [zhxh@cpu.edu.cn](mailto:zhxh@cpu.edu.cn)

22    Jian Gong, [gongjian\\_1979@163.com](mailto:gongjian_1979@163.com), ORCID: 0000-0002-4934-8599

23

24

25     **Abstract**

26     It has been recently shown that the adjunct use of corticosteroids in the treatment of  
27     community-acquired pneumonia shorten the time taken to reach clinical stability (time  
28     to clinical stability) in patients with community-acquired pneumonia (CAP).  
29     Considering the hyperglycemic effects of corticosteroids, there are concerns about the  
30     efficacy and safety of this therapy for children with CAP. Our objective is to evaluate  
31     the influence of recent advances in adjunct corticosteroid use and/or aerosolized  
32     antibiotic administration on admission to hospital with our main outcome being

NOTE: This preprint reports new research that has not been certified by peer review and should not be used to guide clinical practice.

33 duration of fever and hospital stay, and additional outcomes as the time to clinical  
34 stability therapeutic efficacy, C-reactive protein and defervescence at 24, 48, and 72  
35 hours after starting treatment in a well-defined cohort of children with community-  
36 acquired pneumonia. Therapeutic efficacy is defined as the rate of achieving clinical  
37 recovery with no fever, improvement or disappearance of cough, and improved or  
38 normal laboratory values. Five academic literature databases will be searched using  
39 Boolean keyword searches. Articles eligible for inclusion are those that present original  
40 research with the study topic as CAP, the study was designed as a randomized  
41 controlled trial (RCT) or clinical trial (CT) or an observational study with controls. The  
42 review will result in a narrative synthesis that summarizes the effectiveness of  
43 corticosteroid use in children.

44 Keywords: community-acquired pneumonia, corticosteroids, pediatrics, children,  
45 efficacy

46

## 47 **Introduction**

### 48 **Rationale**

49 Pneumonia is an infection that inflames the air sacs in one or both lungs. The air sacs  
50 may fill with fluid or pus, causing cough with phlegm or pus, fever, chills and difficulty  
51 breathing. A variety of organisms, including bacteria, viruses and fungi can cause  
52 pneumonia[1]. Pneumonia can range in seriousness from mild to life threatening[2]. It  
53 is most serious for infants and young children, people older than 65, and people with  
54 underlying health problems or weakened immune system[3]. Pneumonia can be broadly  
55 categorized as community-acquired pneumonia, hospital acquired (nosocomial)  
56 pneumonia and ventilator associated[4]. Specific pathogens such as mycoplasma  
57 pneumoniae, streptococcus pneumoniae, respiratory syncytial virus and haemophilus  
58 influenza type b have been found to increase the risk of hospitalization[5]. Risk factors  
59 for pneumonia in children include infancy, premature birth, incomplete immunization,  
60 maternal smoking or household tobacco smoke exposure, indoor air pollution, low  
61 birthweight, malnutrition, lack of exclusive breastfeeding and overcrowding [6, 7].  
62 Pneumonia can be spread in multiple ways, the viruses and bacteria that are found in a  
63 child's nose or throat, can infect the lungs if they are inhaled[8]. They may also spread  
64 via air-borne droplets from a cough or sneeze. Also, pneumonia may spread through  
65 blood during and shortly after birth[9]. The presenting features of viral and bacterial  
66 pneumonia are similar[10]. However, the symptoms of viral pneumonia may be more  
67 numerous than bacterial pneumonia. In children under 5 years of age, who have cough  
68 and/or difficult breathing, with or without fever, pneumonia is diagnosed by the  
69 presence of either fast breathing or lower chest wall in-drawing where their chest moves  
70 in or retracts during inhalation[11]. Wheezing is most common in viral infections.

71 Severely ill infants may be unable to feed or drink and may also experience  
72 unconsciousness, hypothermia and convulsions[12]. Pneumonia is treated with  
73 antibiotics, amoxicillin being the first line of treatment[13]. Hospitalization is required  
74 for severe cases of pneumonia. The most effective way to prevent pneumonia is  
75 immunization against Haemophilus Influenza type b (Hib), pneumococcus, measles  
76 and whooping cough(pertussis)[14]. Adequate nutrition improves the child's natural  
77 defenses, starting with exclusive breastfeeding for the first six months of life[15].  
78 Encouraging good hygiene and providing affordable clean indoor stoves (in crowded  
79 homes) helps to reduce pneumonia infection in children[16]. In children infected with  
80 HIV are given cotrimoxazole daily to decrease the risk of contracting pneumonia[17].

81

## 82 **Community-acquired pneumonia**

83 Community-acquired pneumonia (CAP) is the most common type of pneumonia. It  
84 occurs outside of hospitals and other healthcare facilities and may be caused by  
85 respiratory syncytial virus, streptococcus pneumoniae being the most common bacterial  
86 cause, bacteria like organisms like mycoplasma pneumoniae and fungi which comes in  
87 soil and bird droppings[18] [19].

88

## 89 **Diagnosis of CAP**

### 90 **Clinical Diagnosis**

91 Tachypnoea, hypoxia, cough and increased work of breathing has been found to be  
92 signs of pneumonia[20]. Common clinical symptoms of CAP include cough, fever,  
93 chills, fatigue, dyspnea, rigors, and pleuritic chest pain. Depending on the pathogen, a  
94 patient's cough may be persistent and dry, or it may produce sputum[21].The World  
95 Health Organization criteria in the diagnosis of childhood pneumonia is categorized  
96 as follows:

- 97 • In children < 2 months :> 60 breaths/minute
- 98 • In children 2-12 months:> 50 breaths/minute
- 99 • In children > 12 months :>40 breaths /minute

100

### 101 **Etiological diagnosis**

102 Virus infection, mostly by respiratory syncytial virus is more common in younger  
103 children[22]. In older children, the most identified pathogen is streptococcus  
104 pneumoniae, followed by mycoplasma and chlamydia[23]. Diagnostic modalities

105 available for etiological diagnosis include molecular diagnostics, microscopy, culture  
106 and antigen detection[24]. Both bacterial and viral pneumonia exhibit a wide  
107 distribution of acute phase reactants (blood count, C reactive protein, erythrocyte  
108 sedimentation rate)[22].Upper respiratory tract secretions are useful in virological  
109 diagnosis. Pulmonary TB should be considered in a child presenting with severe  
110 pneumonia or pneumonia with a known TB contact[25].

111

## 112 **Radiological diagnosis**

113 The radiological signs of pneumonia overlap with those of collapse. Chest radiography  
114 does not distinguish between viral and bacterial infection and is unable to detect early  
115 changes in pneumonia.[7]However, chest radiography improves the diagnosis of  
116 pediatric community acquired pneumonia to a certain degree and may prevent over-  
117 treatment with antibiotics[26] .

118

## 119 **Assessment of severity**

120 The general appearance of a child should be assessed in order to evaluate the severity  
121 of the illness. Any general danger sign requires a child to be referred to a  
122 hospital[27].All children less than 2 months of age with signs of pneumonia require  
123 hospital admission. Inability to drink/feed, vomiting everything, convulsions, lower  
124 chest in-drawing, central cyanosis, lethargy, nasal flaring, grunting, head nodding, and  
125 oxygen saturation <90% are predictors of death and can be used as indicators for  
126 hospitalization[28].Pulse oximetry should also be performed in all children, using a  
127 pediatric wrap-around probe. A saturation of<92% or 90% at higher altitudes (>1 800m)  
128 indicates the need for hospital admission and supplemental oxygen[29]. Transfer to  
129 pediatric intensive care unit should be considered when: the patient is shocked, failure  
130 to maintain rising respiratory and pulse rates with clinical evidence of severe respiratory  
131 distress, recurrent apnea or slow irregular breathing[30]

132

## 133 **Corticosteroid**

134 Corticosteroids are synthetic analogs of the natural steroid hormones produced by the  
135 adrenal cortex and include glucocorticoids and mineral corticoids[31]. Corticosteroids  
136 work primarily by modulating transcriptional, post-transcriptional, and post-  
137 translational mechanisms within cellular nuclei to decrease the production of

138 inflammatory mediators[32]. Glucocorticoids are involved in metabolism and have  
139 immune-suppressive, anti-inflammatory and vasoconstrictive effects while mineral  
140 corticoids regulate electrolytes and water balance by affecting ion transport in the  
141 epithelial cell of renal tubules[33]. Corticosteroids are readily absorbed in the  
142 gastrointestinal tract and are highly protein-bound. They undergo hepatic metabolism  
143 and renal excretion[31]. Corticosteroids at high concentrations will also inhibit the  
144 production of B cells and T cells[34].

145

## 146 **How intervention might work**

147 With the increasing reported cases of pneumonia in recent years, there has been an  
148 introduction of other supportive therapies for the treatment of MP infection[35].  
149 Adjunct treatment therapies for CAP infections include the use of corticosteroids and  
150 aerosolized antibiotics[36]. This might be due to the rapidly increased cases among  
151 children, particularly sub-Saharan Africa and in East Asian countries such as Korea,  
152 Japan, and China. As corticosteroids have been shown to be of use as adjunct therapy  
153 in the treatment of community-acquired pneumonia (CAP) it is important to note their  
154 effects and physiological roles. The clinical implications of these therapies have not  
155 been fully elucidated[37], thus it is imperative to note any advancements in these  
156 therapies. Moreover, there is need for supportive treatment options in CAP cases with  
157 clinical deterioration. However, the use of corticosteroids in children is limited  
158 because of their toxicity. Methylprednisolone may cause adverse effects such as  
159 growth retardation, weight gain, Cushingoid features and osteoporosis in children[38,  
160 39]. Therefore, they are contraindicated for premature infants. Aerosolized antibiotics  
161 have been found to provide high concentration of drugs at the target site of action in  
162 patients with pulmonary infections[17].

163

## 164 **Methods**

### 165 **Search strategy**

166 Our search strategy is developed based on systematic review best practices. To  
167 identify relevant studies, we will perform an extensive search across 5 electronic full-  
168 text databases; Medline/PubMed, Embase, the Cochrane Library, Scopus and Web of  
169 Science with no language restrictions. These databases will be searched using  
170 keywords for community acquired pneumonia, corticosteroid and children as shown  
171 in a table (Table 2). Database specific Boolean search strategies were developed and  
172 follow the general format: corticosteroid terms AND (community acquired  
173 pneumonia terms or children's terms) we will search articles published from January

174 1967 to March, 2022 using a protocol designed for this study. The search terms used  
 175 for each database are listed below:

176 **Table 1. Databases included in the systematic review**

| <b>Databases</b>          | <b>URL</b>                                                                                   |
|---------------------------|----------------------------------------------------------------------------------------------|
| Web of science            | <a href="http://www.webofknowledge.com">www.webofknowledge.com</a>                           |
| Medline/PubMed            | <a href="http://pubmed.ncbi.nlm.nih.gov/">pubmed.ncbi.nlm.nih.gov/</a>                       |
| Embase                    | <a href="http://www.embase.com">www.embase.com</a>                                           |
| Scopus                    | <a href="http://www.elsevier.com">www.elsevier.com</a>                                       |
| The Cochrane Library      | <a href="http://www.cochranelibrary.com/">www.cochranelibrary.com/</a>                       |
| World Health Organization | <a href="http://www.who.int/health-topics/pneumonia">www.who.int/health-topics/pneumonia</a> |

177

178 **Table 2. Search keywords**

| <b>Corticosteroid terms</b>    | <b>Children terms</b> |
|--------------------------------|-----------------------|
| “Corticosteroids”              | “Pediatrics”          |
| “Prednisolone”                 | “Infant”              |
| “Cortisone”                    | “Children”            |
| “Hydrocortisone”               | “Pre-school child”    |
| “Budesonide”                   | “Child”               |
| “Dexamethasone”                | “Newborn”             |
| “Prednisone”                   | “Toddler”             |
| “Glucocorticoids”              | “Kid”                 |
| “Mineral corticoids”           | “Neonate”             |
| <b>Pneumonia terms</b>         |                       |
| “Community-acquired pneumonia” |                       |
| “Mycoplasma pneumonia”         |                       |
| “Pediatric-pneumonia”          |                       |

|                       |  |
|-----------------------|--|
| “Childhood-pneumonia” |  |
|-----------------------|--|

179

180 **Study selection, quality assessment, and data extraction**

181 Studies are to be screened by two independent reviewers based on the title and  
182 abstract, followed by full-text screening. The literature selection process will be  
183 conducted in accordance with the Preferred Reporting Items for Systematic Reviews  
184 and Meta-Analysis Protocols 2015 statement[40]. The quality of the selected studies  
185 will be assessed using the Cochrane Risk of Bias Tools for RCTs and the revised Risk  
186 of Bias Tool for Non-Randomized Studies for observational studies. The data  
187 extraction form will include the following information: first author, year of  
188 publication, population in each group, antibiotic treatment (macrolides/comparator),  
189 patient characteristics (age and sex), and outcomes (durations of fever and  
190 hospitalization, therapeutic efficacy, and defervescence rates at 24, 48, and 72 h after  
191 starting treatment). Therapeutic efficacy is defined as the rate of achieving clinical  
192 recovery with no fever, improvement or disappearance of cough, and improved or  
193 normal laboratory values. Study selection, quality assessment, and data extraction to  
194 be conducted. Any disagreements to be resolved through discussion. If the results of  
195 the selected studies are unclear or missing, we will contact the corresponding study  
196 investigators to obtain or confirm data

197

198 **Eligibility criteria**

199 Articles that meet the following inclusion criteria will be included: (1) the study topic  
200 was CAP, defined as a disease showing no clinical or radiological improvement 48–  
201 72 h after macrolide administration; (2) the subjects are children aged  $\leq 12$  years  
202 (3) the study was designed as a randomized controlled trial (RCT), Clinical Trial (CT)  
203 or an observational study with controls; (4) the intervention agent should be a  
204 corticosteroid known to be active against community-acquired pneumonia, such as  
205 methylprednisolone (5) the control was a placebo; and (6) at least one of the  
206 predetermined outcomes was reported. Animal and preclinical studies, as well as  
207 articles other than original research articles (e.g., reviews, editorials, letters,  
208 conference abstracts, and comments) are to be excluded. Studies with duplicate  
209 subjects (i.e., different studies using the same outcome indicators in the same number  
210 of patients) are also going to be excluded. Our search strategy will implement no  
211 language restrictions, and non-English articles should be translated and included for  
212 evaluation

213



214 **Data synthesis**

215 Statistical synthesis of data(meta-analyses) will be conducted. A systematic narrative  
216 synthesis will be provided with the information presented in text and tables to  
217 summarize and explain the characteristics and findings of the included studies.

218 The following is a tentative outline of how we will synthesize findings. First,  
219 community-acquired pneumonia in children’s conceptualizations will be summarized.  
220 This will include definitions provided by community-acquired pneumonia  
221 researchers. Second, the antecedents of community-acquired pneumonia in children  
222 will be summarized. This will likely to include the grouping of corticosteroid  
223 therapies in the treatment of community-acquired pneumonia in children from  
224 literature. Finally, the evidence on recent advances in efficacy of corticosteroids and  
225 other supportive therapies in the treatment of community-acquired pneumonia will be  
226 incorporated into the theoretical framework.

227

228 **Statistical analysis**

229 We will pool the findings from the included studies such as calculated mean, standard  
230 deviation, and sample size. For outcomes presented as continuous variables, such as  
231 fever duration, hospital stay length, and therapeutic efficacy, we will calculate mean  
232 differences with 95% confidence intervals (CIs). For dichotomous outcomes such as  
233 the achievement of defervescence after 24, 48, and 72 h of treatment, we will  
234 calculate odds ratios (ORs) with 95% CIs. The average effect summary will be  
235 calculated using a random-effects model (Mantel–Haenszel method) using Review  
236 Manager 5.3 (The Cochrane Collaboration, London, UK) including the *I*<sup>2</sup> statistic. *I*<sup>2</sup>  
237 of 25%, 50%, and 75% indicated low, moderate, and high heterogeneity, respectively.  
238 To assess the risk of publication bias, we will use funnel plots for visual inspection;  
239 Egger test flow chart of the selection process to be included in meta-analysis. The  
240 strength of the body of evidence will be assessed using GRADE approach[41] .

241

242

243

244

245

246

247

248



249 **Flow chart of the selection process of studies to be included in the meta-analysis**

250

Identify records through database search

251

**Identification**

253

Remove duplicated records

254

255

**Screening**

256

Exclude records based on title only

257

Screen Records

258

**Eligibility**

260

Exclude records based on abstract review

- 1) Case report /series
- 2) Review or meta-analysis

261

262

Full-text articles assessed for eligibility

263

264

**Included**

265

266

Include studies in meta-analysis

Exclude records after full text review

- 1) No mention of community-acquired pneumonia
- 2) Inadequate study protocol (dependent, independent variables)
- 3) No relevant data provided

## 267 **Risk of publication bias**

268 The authors have no conflicts of interest. Ideally, additional reviewers would  
269 participate in study screening and data extraction. However, this is not feasible since  
270 this publication is not funded.

271

## 272 **Ethics and dissemination**

273 This systematic review protocol has been written following the PRISMA-P  
274 guidelines and elaboration[40, 42].

275

## 276 **Discussion**

277 Corticosteroids may be imperative for the treatment of community-acquired  
278 pneumonia. Therapeutic doses vary greatly, as do adverse effects. Patients require  
279 education on what to expect with corticosteroid use, whether it be short course or  
280 long-term use. Other pharmacological therapies may be necessary to counteract  
281 corticosteroid-related adverse effects, such as gastric acid suppression, calcium and  
282 vitamin D supplementation, and opportunistic infection prophylaxis. Providers must  
283 weigh the risks versus benefits of corticosteroid use and utilize the lowest effective  
284 dose for the least duration possible to avoid or minimize serious corticosteroid-  
285 induced toxicities. This review searches for the efficacy of corticosteroids as adjunct  
286 therapy in the treatment and management of community-acquired pneumonia in  
287 children. There is an ongoing unclear elucidation on the effectiveness of  
288 corticosteroids use specifically in children under the ages of 5. By carefully  
289 examining the published literature to date, we will contribute a novel synthesis of  
290 literature compared to “corticosteroid use in community-acquired pneumonia”  
291 literature that has been published before.

292

## 293 **Supporting information**

294 1. Table .PRISMA-P checklist (Docx)

295 2. Search strategy draft(doc)

## 296 **Funding**

297 No funding was received for this study

298

## 299 **Author Contributions**

300 **Conceptualization:** Lydia Mukanhaire, Jian Gong

301 **Methodology:** Lydia Mukanhaire, Jian Gong

302 **Supervision:** Xiaohui Zhou, Jian Gong

303 **Writing-original draft:** Lydia Mukanhaire

304 **Writing-review & editing:** Junyan Wang, Xiaoyu Zong, Lingjian Zhang

305

## 306 **References**

307 1. Jain, V., et al., *Pneumonia Pathology*, in *StatPearls*. 2022, StatPearls Publishing

308 Copyright © 2022, StatPearls Publishing LLC.: Treasure Island (FL).

309 2. Stamm, D.R. and H.A. Stankewicz, *Atypical Bacterial Pneumonia*, in *StatPearls*. 2022,  
310 StatPearls Publishing

311 Copyright © 2022, StatPearls Publishing LLC.: Treasure Island (FL).

312 3. Ferreira-Coimbra, J., C. Sarda, and J. Rello, *Burden of Community-Acquired Pneumonia and*  
313 *Unmet Clinical Needs*. *Adv Ther*, 2020. **37**(4): p. 1302-1318.

314 4. Grassi, V. and G. Romanelli, *[Pneumonia: state-of-art and perspectives]*. *Recenti Prog Med*,  
315 2006. **97**(12): p. 697-703.

316 5. Wang, Z., et al., *Investigation on Atypical Pathogens related with Community Acquired*  
317 *Pneumonia and the Factors Associated with Mycoplasma Pneumoniae Infection in Jiangsu,*  
318 *China*. *Clin Lab*, 2020. **66**(6).

319 6. Almirall, J., et al., *Risk Factors for Community-Acquired Pneumonia in Adults: A Systematic*  
320 *Review of Observational Studies*. *Respiration*, 2017. **94**(3): p. 299-311.

321 7. Hassen, M., et al., *Radiologic Diagnosis and Hospitalization among Children with Severe*  
322 *Community Acquired Pneumonia: A Prospective Cohort Study*. *Biomed Res Int*, 2019. **2019**: p.  
323 6202405.

324 8. Alcón, A., N. Fàbregas, and A. Torres, *Pathophysiology of pneumonia*. *Clin Chest Med*, 2005.  
325 **26**(1): p. 39-46.

326 9. Hooven, T.A. and R.A. Polin, *Pneumonia*. *Semin Fetal Neonatal Med*, 2017. **22**(4): p. 206-213.

327 10. March Mde, F. and C.C. Sant'Anna, *Signs and symptoms indicative of community-acquired*  
328 *pneumonia in infants under six months*. *Braz J Infect Dis*, 2005. **9**(2): p. 150-5.

329 11. McCollum, E.D. and A.S. Ginsburg, *Outpatient Management of Children With World Health*  
330 *Organization Chest Indrawing Pneumonia: Implementation Risks and Proposed Solutions*. *Clin*

- 331 Infect Dis, 2017. **65**(9): p. 1560-1564.
- 332 12. Dean, P. and T.A. Florin, *Factors Associated With Pneumonia Severity in Children: A*  
333 *Systematic Review*. J Pediatric Infect Dis Soc, 2018. **7**(4): p. 323-334.
- 334 13. Bielicki, J.A., et al., *Effect of Amoxicillin Dose and Treatment Duration on the Need for*  
335 *Antibiotic Re-treatment in Children With Community-Acquired Pneumonia: The CAP-IT*  
336 *Randomized Clinical Trial*. Jama, 2021. **326**(17): p. 1713-1724.
- 337 14. Leung, D.T., M.J. Chisti, and A.T. Pavia, *Prevention and Control of Childhood Pneumonia and*  
338 *Diarrhea*. Pediatr Clin North Am, 2016. **63**(1): p. 67-79.
- 339 15. Marangu, D. and H.J. Zar, *Childhood pneumonia in low-and-middle-income countries: An*  
340 *update*. Paediatr Respir Rev, 2019. **32**: p. 3-9.
- 341 16. Accinelli, R.A., J.A. Leon-Abarca, and D. Gozal, *Ecological study on solid fuel use and*  
342 *pneumonia in young children: A worldwide association*. Respirology, 2017. **22**(1): p. 149-156.
- 343 17. Zar, H.J. and S.A. Madhi, *Childhood pneumonia--progress and challenges*. S Afr Med J, 2006.  
344 **96**(9 Pt 2): p. 890-900.
- 345 18. Lanks, C.W., A.I. Musani, and D.W. Hsia, *Community-acquired Pneumonia and Hospital-*  
346 *acquired Pneumonia*. Med Clin North Am, 2019. **103**(3): p. 487-501.
- 347 19. Leung, A.K.C., A.H.C. Wong, and K.L. Hon, *Community-Acquired Pneumonia in Children*.  
348 Recent Pat Inflamm Allergy Drug Discov, 2018. **12**(2): p. 136-144.
- 349 20. Shah, S.N., et al., *Does This Child Have Pneumonia?: The Rational Clinical Examination*  
350 *Systematic Review*. Jama, 2017. **318**(5): p. 462-471.
- 351 21. Lutfiyya, M.N., et al., *Diagnosis and treatment of community-acquired pneumonia*. Am Fam  
352 Physician, 2006. **73**(3): p. 442-50.
- 353 22. Claesson, B.A., et al., *Etiology of community-acquired pneumonia in children based on*  
354 *antibody responses to bacterial and viral antigens*. Pediatr Infect Dis J, 1989. **8**(12): p. 856-62.
- 355 23. Nascimento-Carvalho, C.M., *Etiology of childhood community acquired pneumonia and its*  
356 *implications for vaccination*. Braz J Infect Dis, 2001. **5**(2): p. 87-97.
- 357 24. Ning, G., et al., *The etiology of community-acquired pneumonia among children under 5 years*  
358 *of age in mainland China, 2001-2015: A systematic review*. Hum Vaccin Immunother, 2017.  
359 **13**(11): p. 2742-2750.
- 360 25. Nantongo, J.M., et al., *High incidence of pulmonary tuberculosis in children admitted with*  
361 *severe pneumonia in Uganda*. BMC Pediatr, 2013. **13**: p. 16.
- 362 26. Soudack, M., et al., *The Added Value of the Lateral Chest Radiograph for Diagnosing*  
363 *Community Acquired Pneumonia in the Pediatric Emergency Department*. Isr Med Assoc J,  
364 2018. **20**(1): p. 5-8.
- 365 27. Ning, J., et al., *Valuable hematological indicators for the diagnosis and severity assessment of*  
366 *Chinese children with community-acquired pneumonia: Prealbumin*. Medicine (Baltimore),  
367 2016. **95**(47): p. e5452.
- 368 28. Nascimento-Carvalho, C.M., *Community-acquired pneumonia among children: the latest*  
369 *evidence for an updated management*. J Pediatr (Rio J), 2020. **96 Suppl 1**: p. 29-38.
- 370 29. Ambroggio, L., et al., *Guideline Adoption for Community-Acquired Pneumonia in the*  
371 *Outpatient Setting*. Pediatrics, 2018. **142**(4).
- 372 30. Shi, T., et al., *Risk factors for mortality from severe community-acquired pneumonia in*  
373 *hospitalized children transferred to the pediatric intensive care unit*. Pediatr Neonatol, 2020.  
374 **61**(6): p. 577-583.

- 375 31. Kapugi, M. and K. Cunningham, *Corticosteroids*. Orthop Nurs, 2019. **38**(5): p. 336-339.
- 376 32. Kaplan, D.J., et al., *The Simplified Science of Corticosteroids for Clinicians*. JBJS Rev, 2020.
- 377 **8**(11): p. e2000038.
- 378 33. Sibilia, J., [*Corticosteroids and inflammation*]. Rev Prat, 2003. **53**(5): p. 495-501.
- 379 34. Greaves, M.W., *Anti-inflammatory action of corticosteroids*. Postgrad Med J, 1976. **52**(612):
- 380 p. 631-3.
- 381 35. Wunderink, R.G. and L. Mandell, *Adjunctive therapy in community-acquired pneumonia*.
- 382 *Semin Respir Crit Care Med*, 2012. **33**(3): p. 311-8.
- 383 36. Huang, L., X. Gao, and M. Chen, *Early treatment with corticosteroids in patients with*
- 384 *Mycoplasma pneumoniae pneumonia: a randomized clinical trial*. J Trop Pediatr, 2014. **60**(5):
- 385 p. 338-42.
- 386 37. Wunderink, R.G., *Adjunctive therapy in community-acquired pneumonia*. Semin Respir Crit
- 387 *Care Med*, 2009. **30**(2): p. 146-53.
- 388 38. Aljebab, F., I. Choonara, and S. Conroy, *Systematic Review of the Toxicity of Long-Course Oral*
- 389 *Corticosteroids in Children*. PLoS One, 2017. **12**(1): p. e0170259.
- 390 39. Aljebab, F., I. Choonara, and S. Conroy, *Systematic review of the toxicity of short-course oral*
- 391 *corticosteroids in children*. Arch Dis Child, 2016. **101**(4): p. 365-70.
- 392 40. Moher, D., et al., *Preferred reporting items for systematic review and meta-analysis protocols*
- 393 *(PRISMA-P) 2015 statement*. Syst Rev, 2015. **4**(1): p. 1.
- 394 41. Schwingshackl, L., G. Rüschemeyer, and J.J. Meerpohl, [*How to interpret the certainty of*
- 395 *evidence based on GRADE (Grading of Recommendations, Assessment, Development and*
- 396 *Evaluation)*]. Urologe A, 2021. **60**(4): p. 444-454.
- 397 42. Shamseer, L., et al., *Preferred reporting items for systematic review and meta-analysis*
- 398 *protocols (PRISMA-P) 2015: elaboration and explanation*. Bmj, 2015. **350**: p. g7647.

399
